# Supplementary material for: A lysine-rich cluster in the N-BAR domain of ARF GTPase-activating protein ASAP1 is necessary for binding and bundling actin filaments
Source: PubMed Central journal article supplement (PMC8902617; doi:10.1016/j.jbc.2022.101700), 2022-02-08
Supplement: mmc1.pdf [file mmc1.pdf]

## Supporting Information

### Figure Legends

**Figure S1, related to Figure 2. A.** Thermal stability assay of ASAP1 BAR-PH mutants. Alanine scanning or charge reversal mutants of ASAP1 BAR-PH were heated at the indicated temperature and remaining soluble (stable) fractions were resolved on SDS-PAGE and quantified. Gels representative of at least two experiments done in triplicates are shown for each mutant. Resulting melting curves were fitted using Prism and are shown as two separate graphs for clarity of presentation. **B.** Summary of calculated  $T_m$  (melting temperature) for each protein as a mean  $\pm$  SEM of all experiments. RT- room temperature.

**Figure S2, related to Figure 5. Complementation with ASAP1 [K75E, K76E, K79E] does not rescue the effects of ASAP1 downregulation on actin stress fibers.** U2OS cells were stably transduced with tet-inducible empty vector, full-length wild type (HA-ASAP1) or HA-ASAP1 [K75E, K76E, K79E] lentiviruses and transfected with control (diCtrl) DICER substrate RNA duplex or diRNA against the 3'UTR region of human ASAP1 (diASAP1). After 24 hours, expression of the empty vector or ASAP1 was induced or not with doxycycline (100 ng/mL) for 48 hours. Cells were plated on fibronectin in serum-free media, fixed and stained with fluorescent phalloidin for F-actin and imaged with a confocal microscope. Z-projection of the images were analyzed with the Ridge Detector plugin in Fiji to quantify the number of actin filaments greater than 2.2  $\mu\text{m}$  in length in each cell. The results are presented in the graphs, with each point representing the number of filaments in a cell under the indicated condition. Each graph has data from an individual experiment. The summarized data are presented in Figure 5.

**Figure S3, related to Figure 6.** Results of ClustalW alignment of BAR-PH regions of human and mouse ASAP subtypes was visualized in JalView. Amino acids examined in this study are in boxes.

**Figure S1. Gasilina et al.**

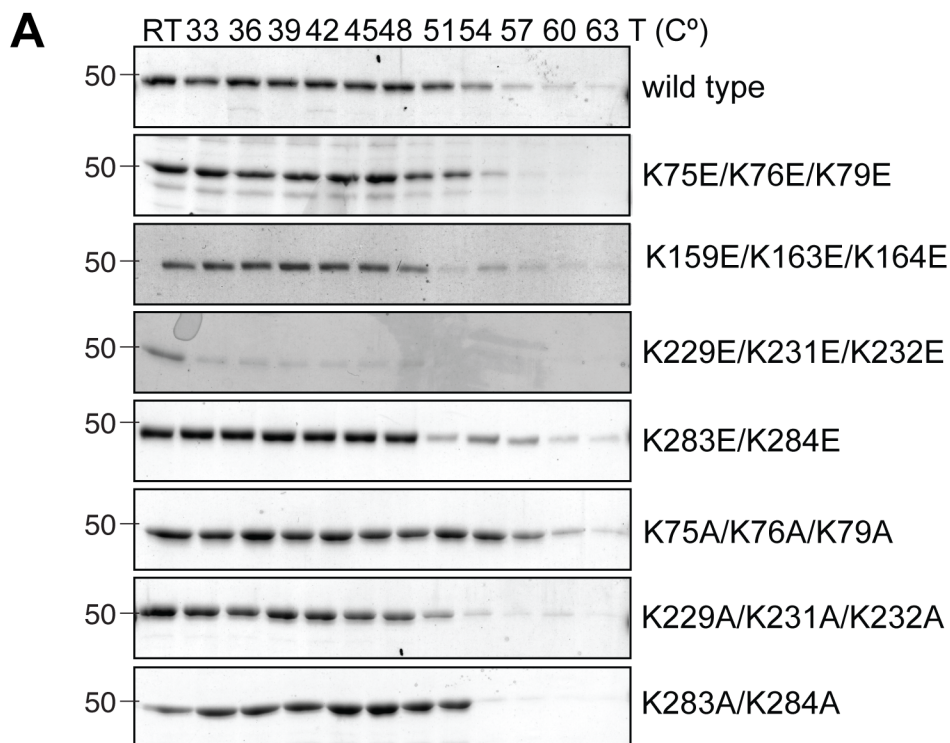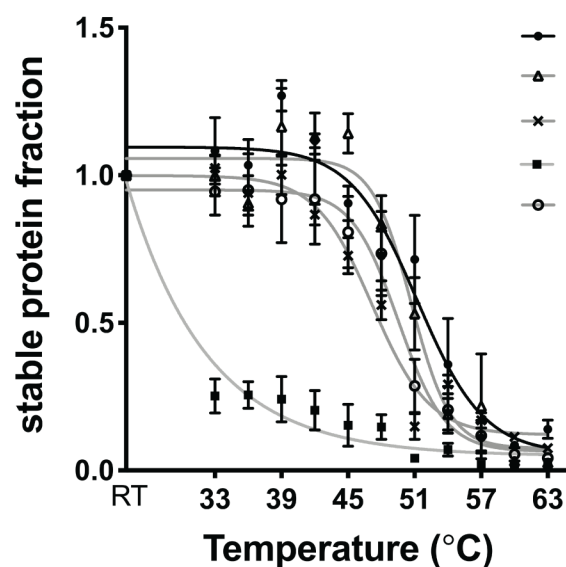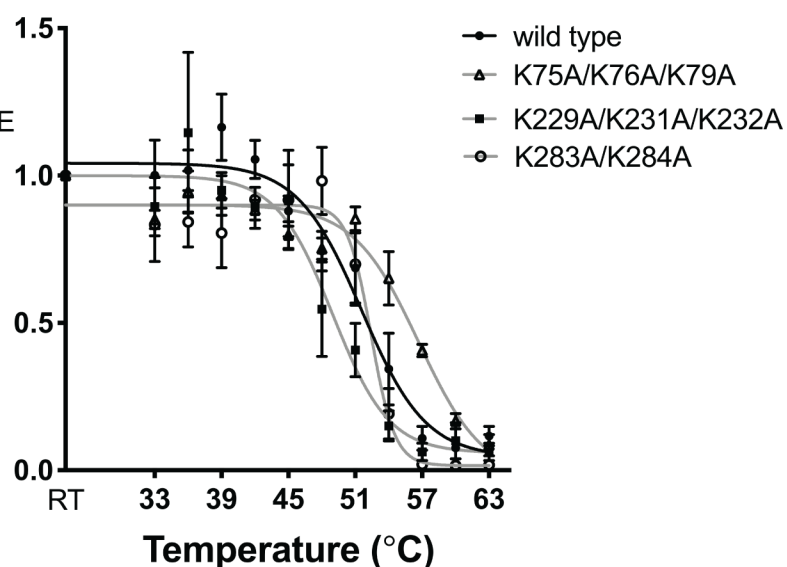

**B**

| protein           | Tm             |
|-------------------|----------------|
| wild type         | 51.2 ± 0.9     |
| K75E/K76E/K79E    | 50.7 ± 0.6     |
| K159E/K163E/K164E | 47.2 ± 0.5     |
| K229E/K231E/K232E | not determined |
| K283E/K284E       | 49.5 ± 0.8     |
| K75A/K76A/K79A    | 56.7 ± 4.5     |
| K159A/K163A/K164A | no expression  |
| K229A/K231A/K232A | 49.0 ± 1.0     |
| K283A/K284A       | 52.4 ± 0.5     |
| K101/K105A        | no expression  |

# Figure S2. Gasilina et al.

## rescue with empty vector

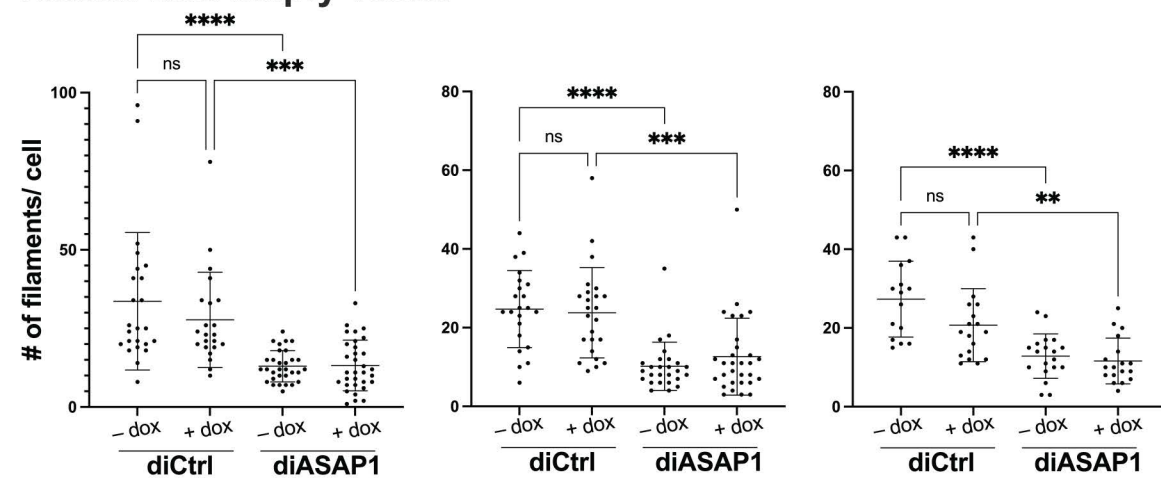

## rescue with wild type ASAP1

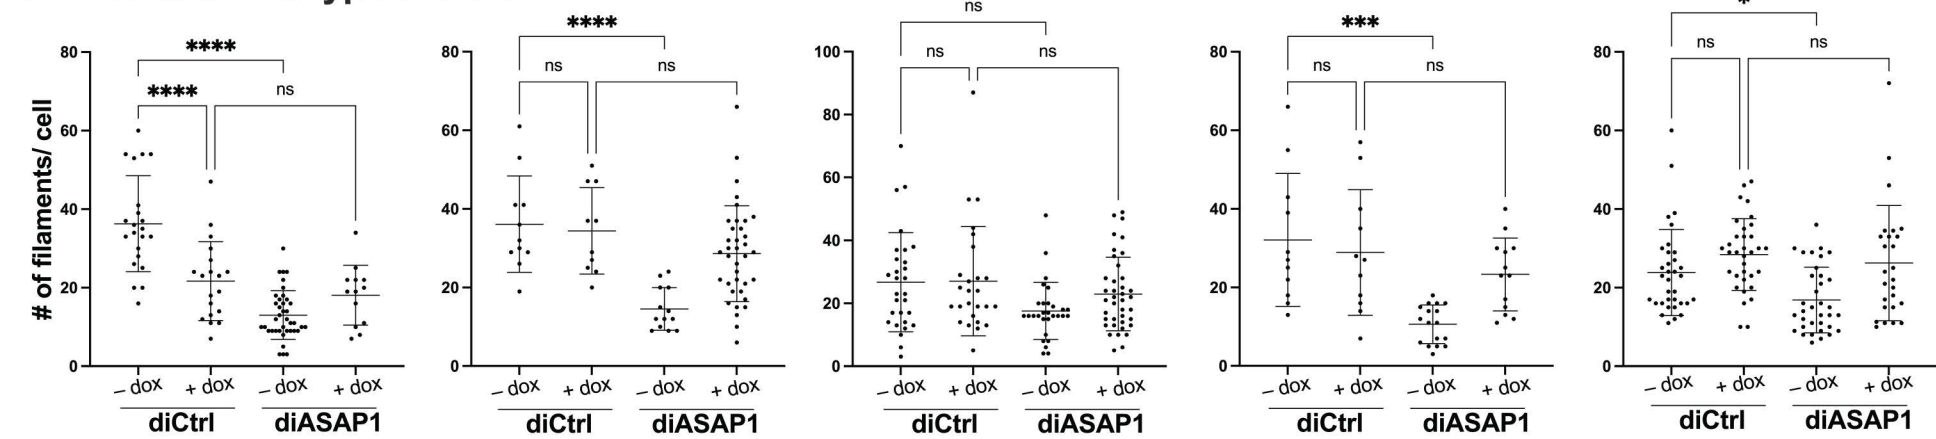

## rescue with K75E, K76E, K79E ASAP1

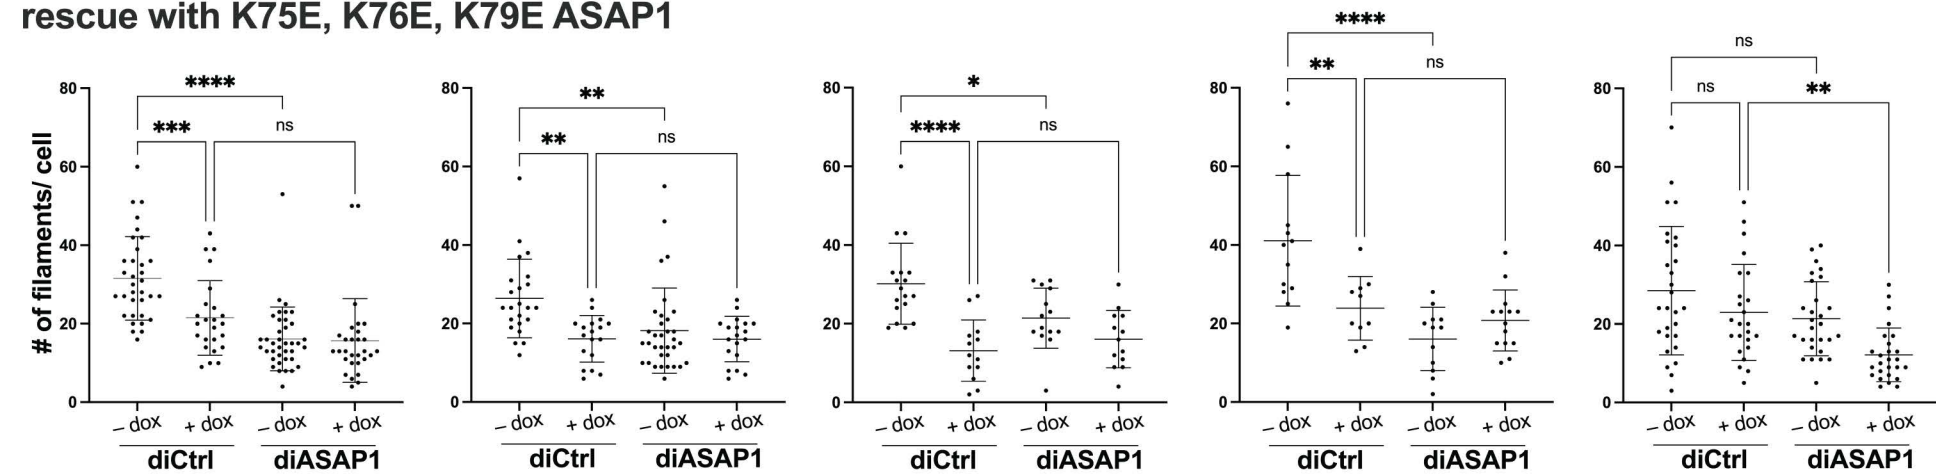

Figure S3 Gasilina et al.

```
ASAP1_human/1-416 1 MRSSASRLLSFSRRDLSLWNRMPDQISVSEFIAETTEDYNSPT-TSSFTTRLHNCRNVTLL EEAALDQDRRTALQVKKISVKA IYNSGQDHVQVNEENYAQVLDKIFGNSFL 107
ASAP1_mouse/1-431 1 MRSSASRLLSFSRRDLSLWNRMPDQISVSEFIAETTEDYNSPT-TSSFTTRLHNCRNVTLL EEAALDQDRRTALQVKKISVKA IYNSGQDHVQVNEENYAQVLDKIFGNSFL 107
ASAP2_human/1-397 1 -----MPDQISVSEFVAETHEDYKAPT-ASSFTTRTAQRNVTAAIEEALDQDRMVLKMKKSVKAI NS SGLAHVENE EQYTALEKIFGGNCV 87
ASAP2_mouse/1-400 1 -----MPDQISVSEFVAETHEDYKAPT-ASSFTTRTAQRNVTAAIEEALDQDRMVLKMKKSVKAI NS SGLAHVENE EQYTALEKIFGGNCV 87
ASAP3_human/1-394 1 -----MP EQFSVAEFLAVTAEDLSSPAGAAAFAAKMPRYRGAALAREEILEGDQAI LQRIKKAVRIAHS SGLGHVENE EQYREAVESILGNSHL 88
ASAP3_mouse/1-394 1 -----MP EQLSVAEFLAVTAEDLSSPAGAAAFAAKMPRCRGAALAREEALGDQAI LQRIKKAVRIAHS SGLGHVETEEHYREAVEALGNSHL 88

ASAP1_human/1-416 108 SRDNDPLGTAFVKFSTLTKE LSTLLK NLLQGLSHNVIFTLDSLLKGGDLKGVKGGDLKKIPFDKAWKDYETKFTKI EKEKREHAKQHGMIRTEITGAEIAEEMEKERRLFQ 215
ASAP1_mouse/1-431 108 SRDNDPLGTAFVKFSTLTKE LSTLLK NLLQGLSHNVIFTLDSLLKGGDLKGVKGGDLKKIPFDKAWKDYETKFTKI EKEKREHAKQHGMIRTEITGAEIAEEMEKERRLFQ 215
ASAP2_human/1-397 88 CRDDPDLGSAFLKFSVFTKELTALFNLIQNMMNIISFP LDSLKGGDLKGVKGGDLKKIPFDKAWKDYETKFTKI EKEKREHAKLHGMIRTEISGAEIAEEMEKERRFFQ 195
ASAP2_mouse/1-400 88 CRDDPDLGSAFLKFSVFTKELTALFNLIQNMMNIISFP LDSLKGGDLKGVKGGDLKKIPFDKAWKDYETKFTKI EKEKREHAKLHGMIRTEISGAEIAEEMEKERRFFQ 195
ASAP3_human/1-394 89 SQNSHELSTGFLNLAVFTREVAALFNLIQNMMNIISFP LDSLMMKGLRIDGRQDSKKQL EKAWKDY EAKMAKLEKERDRARVTGGIPG-----EVAQDMQRERRIFQ 190
ASAP3_mouse/1-394 89 SQNSHELSTGFLNLAVFTREVAALFNLIQNMMNIISFP LDSLMMKGLRIDGRHDSKKHLEKAWKDYESKVAKLEKERDRARFPGGSHG-----VMSQDQTRERRRVFQ 190

ASAP1_human/1-416 216 LQMCEYL I KVNE I K T K K I G V D L L Q N L I K Y Y H A Q C N F F Q D G L K T A D K L K Q Y I E K L A A D L Y N I K Q T Q D E E K K Q L T A L R D L I K S S L Q L D Q K ----- E D S Q S R 308
ASAP1_mouse/1-431 216 LQMCEYL I KVNE I K T K K I G V D L L Q N L I K Y Y H A Q C N F F Q D G L K T A D K L K Q Y I E K L A A D L Y N I K Q T Q D E E K K Q L T A L R D L I K S S L Q L D Q K ----- E D S Q S R 323
ASAP2_human/1-397 196 LQMCEYLLK VNE I K I K K I G V D L L Q N L I K Y F H A Q C N F F Q D G L K A V E S L K P S I E T L S T D L H T I K Q A Q D E E R R Q L I Q L R D I L K S A L Q V E Q K E ----- D S Q I R Q 289
ASAP2_mouse/1-400 196 LQMCEYLLK VNE I K I K K I G V D L L Q N L I K Y F H A Q C N F F Q D G L K A V E S L K P S I E T L S T D L H T I K Q A Q D E E R R Q L I Q L R D I L K S A L Q V E Q K E ----- R R D S Q L R Q 292
ASAP3_human/1-394 191 LHMCEYLLKAGE S Q M K G P D F L Q S L I K F F H A Q H N F F Q D G W K A A Q S L F P F I E K L A A S V H A L H Q A Q E D E L Q K L T Q L R D S L R G T L Q L E S R E E ----- H L S R K N S 286
ASAP3_mouse/1-394 191 LHMCEYLVKAGE S I Q V K Q G P D F L Q S L I K F F H A Q H N F F Q D G W K A A Q S L S P F I D K L A A S V H G L R Q A Q E E E I H K L T Q L R D S L R G M L H L E S R E D ----- H P N R K N S 286

ASAP1_human/1-416 309 QGGY SMHQ LQGNE Y G S E K K G Y L L K K S D G I R K V W Q R R K K C S V K N G I L T I S H A T S N R Q P A K N L L T C Q V K P N A E D K K S F D L I S H N R T Y H F Q A E D E Q D Y V A W I S V L T N S K E 416
ASAP1_mouse/1-431 324 QGGY SMHQ LQGNE Y G S E K K G F L L K K S D G I R K V W Q R R K K C A V K N G I L T I S H A T S N R Q P A K N L L T C Q V K P N A E D K K S F D L I S H N R T Y H F Q A E D E Q D Y I A W I S V L T N S K E 431
ASAP2_human/1-397 290 S T A Y S L H Q P Q G N K E H G T E R N G S L Y K K S D G I R K V W Q R R K K C S V K N G F L T I S H G T A N R P P A K N L L T C Q V K T N P E E K K C F D L I S H D R T Y H F Q A E D E Q E C Q I W M S V L Q N S K E 397
ASAP2_mouse/1-400 293 S T A Y S L H Q P Q G N K E H G T E R N G N L Y K K S D G I R K V W Q R R K K C S V K N G F L T I S H G T A N R P P A K N L L T C Q V K T N P E E K K C F D L I S H D R T Y H F Q A E D E Q E C Q I W M S V L Q N S K E 400
ASAP3_human/1-394 287 G C G Y S I H Q H Q G N K Q F G T E K V G F L Y K K S D G I R R V W Q R R K K C G V K Y G C L T I S H S T I N R P V K L P L L T C Q V R P N P E E K K C F D L V T H N R T Y H F Q A E D E H E C E A W V S V L Q N S K D 394
ASAP3_mouse/1-394 287 G C G Y S I H Q H Q G N K Q F G T E K V G F L Y K K S D G I R R V W Q R R K K C G V K Y G C L T I S H S T I N R P V K L P L L T C Q V R P N P E E K K C F D L V T H N R T Y H F H A E D E Q E C E A W V S V L Q N S K 394
```
